# Supplementary material
Source: PubMed Central journal article supplement (PMC5951748)

**Supplementary Figure 1.** Sensitivity analysis of ADCr cut-off point in association with 90-day outcome. Worse outcome across the entire mRS was associated with ADCr below the 50<sup>th</sup> (B,  $p = 0.041$ ) and 66<sup>th</sup> (C,  $p = 0.038$ ) percentiles of ADCr. There was a greater proportion of patients with mRS 5-6 when baseline ADCr was below the 25<sup>th</sup> (A,  $p = 0.0023$ ), and 50<sup>th</sup> (C,  $p = 0.038$ ) percentile of baseline ADCr. A cut-off corresponding to the 75<sup>th</sup> percentile of ADCr (D) was not associated with any significant difference in either overall or dichotomized mRS

Dichotomizing patients at the 33<sup>rd</sup> percentile was associated with significant differences in both overall mRS and mRS 0-4 vs 5-6 ( $p = 0.028$  and  $p = 0.010$ , respectively; data shown in Figure 2).

**Supplementary Table 1. Predictors of swelling volume**

| <b>Entire Cohort</b>    |            |                 |       |        |               |                 |         |       |
|-------------------------|------------|-----------------|-------|--------|---------------|-----------------|---------|-------|
|                         | Univariate |                 |       |        | Multivariable |                 |         |       |
|                         | Beta       | 95% CI          | r2    | p      | Beta          | 95% CI          | Adj. r2 | p     |
| Age                     | 0.009      | -0.013 to 0.031 | 0.01  | 0.42   | —             | —               | —       | —     |
| Baseline NIHSS          | 0.098      | 0.036 to 0.16   | 0.14  | 0.0023 | 0.062         | -0.0029 to 0.13 | 0.20    | 0.061 |
| DWI lesion volume (log) | 0.59       | 0.27 to 0.92    | 0.17  | 0.0005 | 0.45          | 0.10 to 0.80    | 0.20    | 0.013 |
| Baseline Glucose (log)  | 0.53       | -0.22 to 1.3    | 0.031 | 0.16   | —             | —               | —       | —     |

  

| <b>ADCr &lt; 64%</b>    |            |              |      |        |               |              |         |       |
|-------------------------|------------|--------------|------|--------|---------------|--------------|---------|-------|
|                         | Univariate |              |      |        | Multivariable |              |         |       |
|                         | Beta       | 95% CI       | r2   | p      | Beta          | 95% CI       | Adj. r2 | p     |
| DWI lesion volume (log) | 0.95       | 0.28 to 1.61 | 0.33 | 0.0078 | 0.75          | 0.14 to 1.37 | 0.47    | 0.020 |
| AOL 0-1 vs 2-3          | 1.17       | 0.32 to 2.02 | 0.33 | 0.0099 | 0.93          | 0.17 to 1.70 | 0.47    | 0.020 |

  

| <b>ADCr ≥ 64%</b>       |            |                |        |      |               |        |         |   |
|-------------------------|------------|----------------|--------|------|---------------|--------|---------|---|
|                         | Univariate |                |        |      | Multivariable |        |         |   |
|                         | Beta       | 95% CI         | r2     | p    | Beta          | 95% CI | Adj. r2 | p |
| DWI lesion volume (log) | 0.34       | -0.069 to 0.75 | 0.061  | 0.10 | —             | —      | —       | — |
| AOL 0-1 vs 2-3          | 0.10       | -0.39 to 0.59  | 0.0042 | 0.67 | —             | —      | —       | — |

\* Swelling volume was transformed using a cube root to account for non-normal distribution of volumes with a number of zero values.

**A**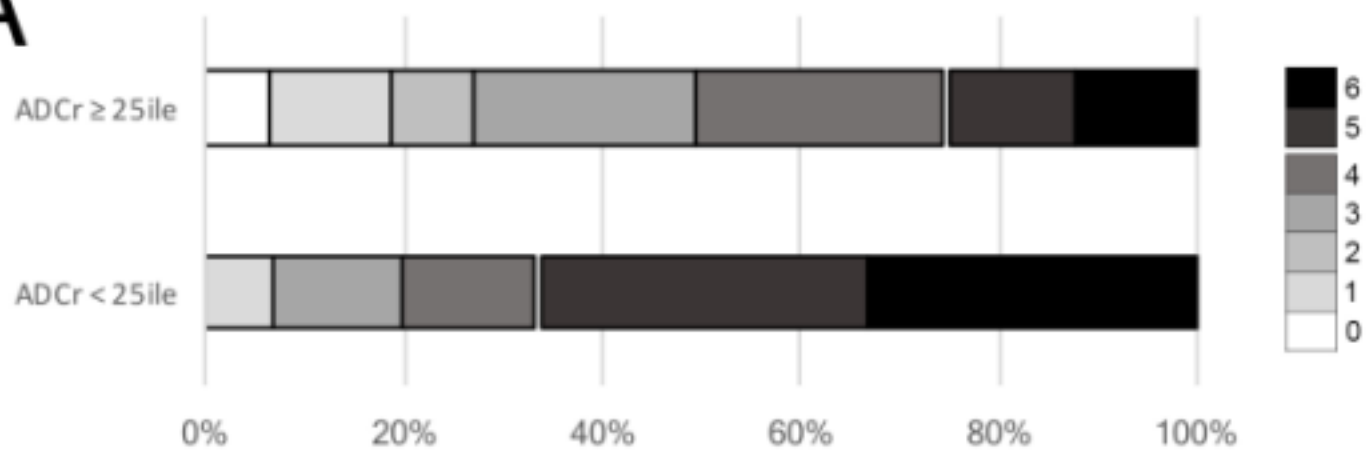**B**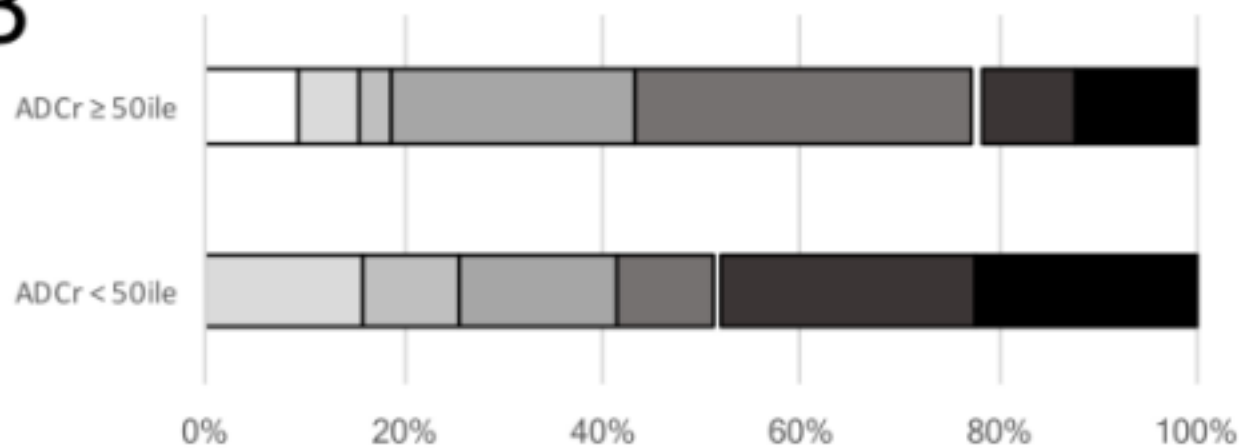**C**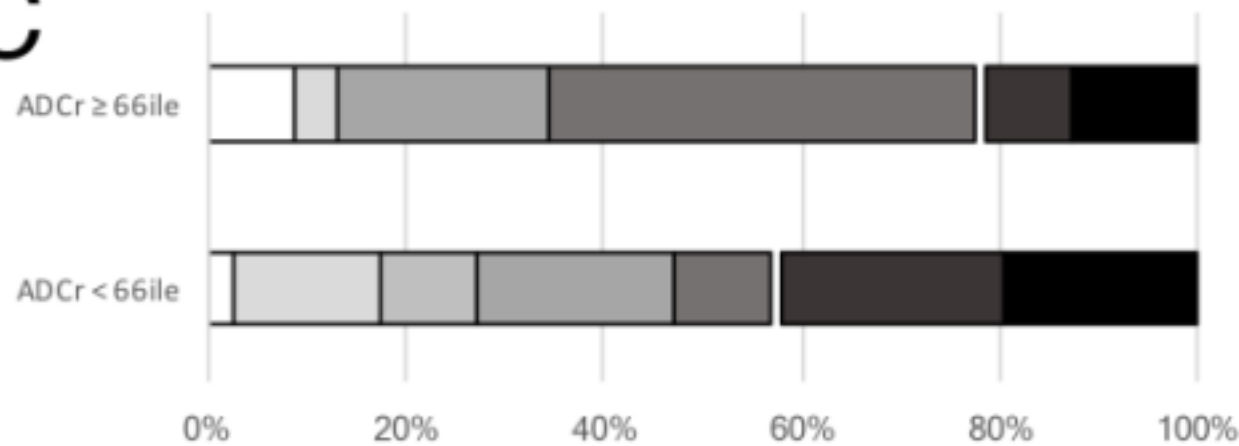**D**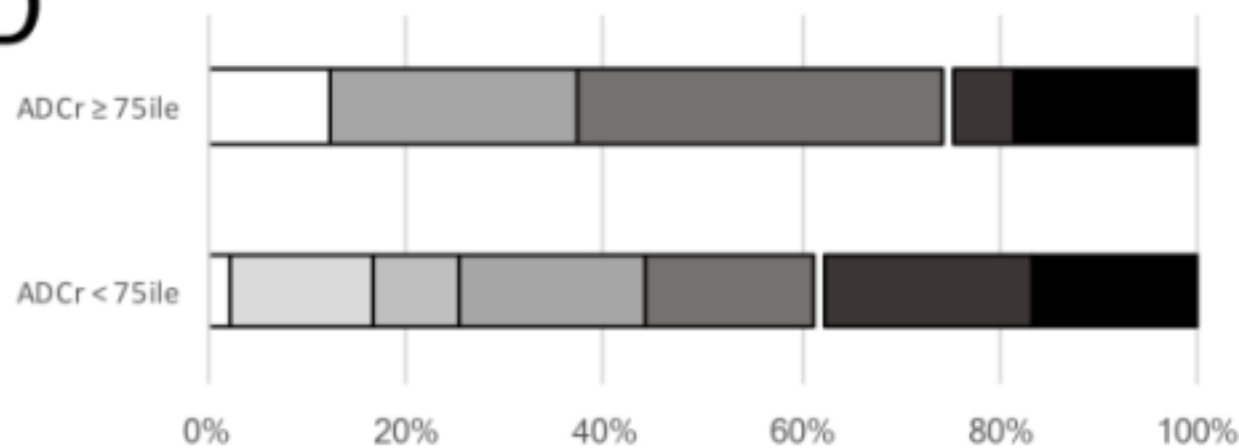

Supplement: NIHMS949438-supplement-supplement_1.pdf [file NIHMS949438-supplement-supplement_1.pdf]
